# Supplementary material for: A BODIPY derivative as a highly selective “Off–On” fluorescent chemosensor for hydrogen sulfate anion
Source: Royal Society of Chemistry journal article supplement (doi:10.1039/c2an35904a), 2012-01-01
Supplement: c2an35904a.pdf [file c2an35904a.pdf]

## Electronic Supplementary Information

### **A BODIPY derivative as highly selective "Off-On" fluorescent chemosensor for hydrogen sulfate anion**

Qian Li<sup>a,b</sup>, Yong Guo<sup>a</sup>, Shijun Shao<sup>a,\*</sup>

<sup>a</sup> *Key Laboratory of chemistry of Northwestern Plant Resources and Key Laboratory for Natural Medicine of Gansu Province, Lanzhou Institute of Chemical Physics, Chinese Academy of Sciences, Lanzhou 730000, P. R. China. [sjshao@licp.cas.cn](mailto:sjshao@licp.cas.cn)*

<sup>b</sup> *Graduate School of the Chinese Academy of Sciences, Beijing 100039, P. R. China.*

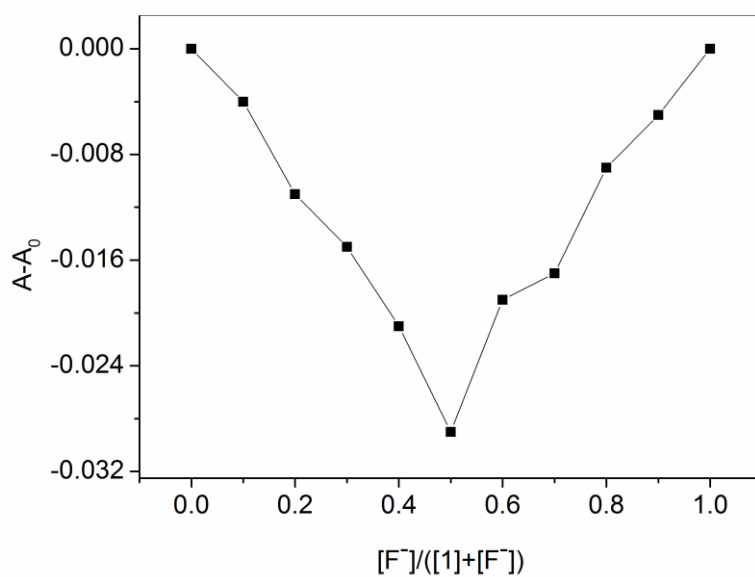

**Fig. S1.** Job's plot for a 1:1 complex of **1** and  $F^-$ , where the difference in absorbance intensity at 324 nm

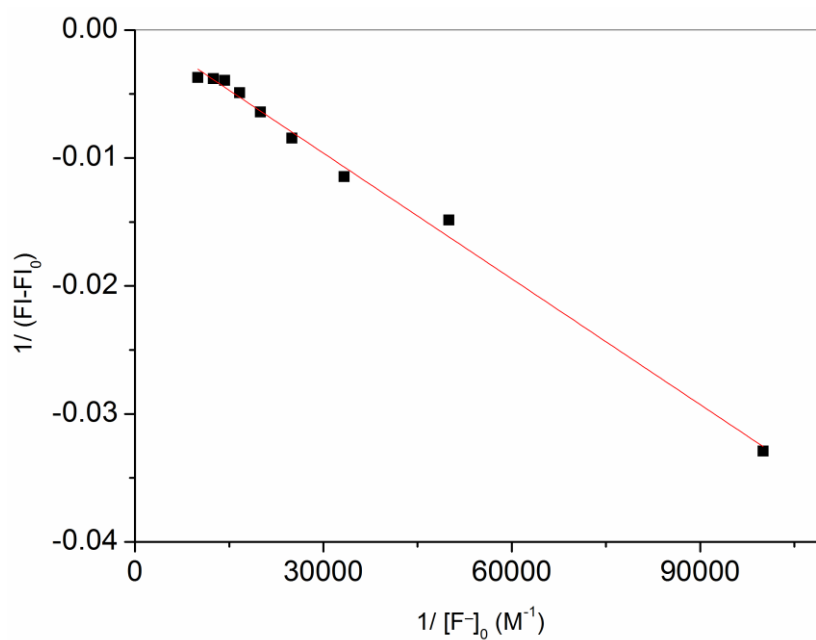

**Fig. S2** Benesi-Hildebrand plot assuming 1:1 stoichiometry for association between receptor **1** and  $F^-$ .

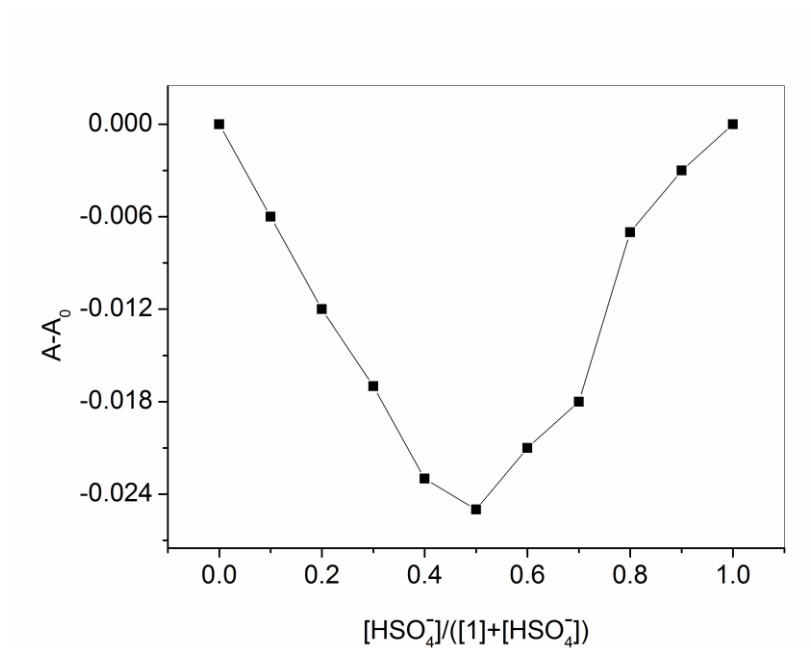

**Fig. S3.** Job's plot for a 1:1 complex of **1** and  $\text{HSO}_4^-$ , where the difference in absorbance intensity at 324 nm.

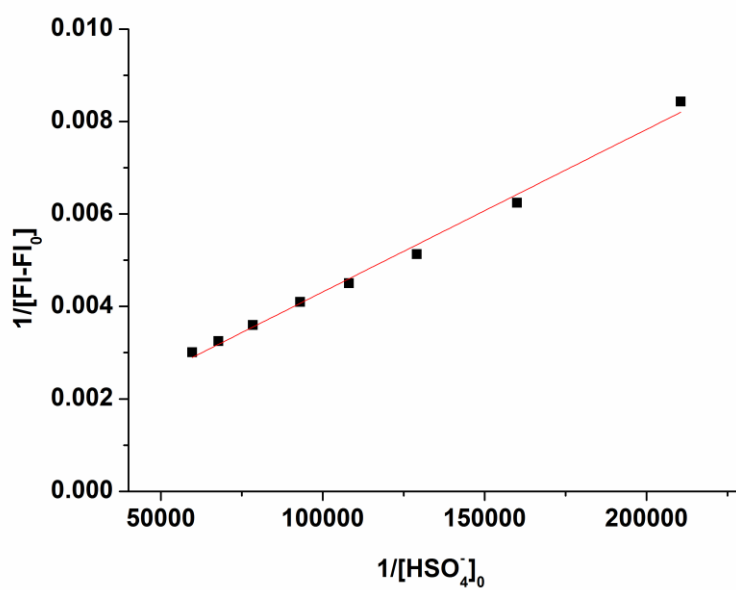

**Fig. S4.** Benesi-Hildebrand plot assuming 1:1 stoichiometry for association between receptor **1** and  $\text{HSO}_4^-$ .

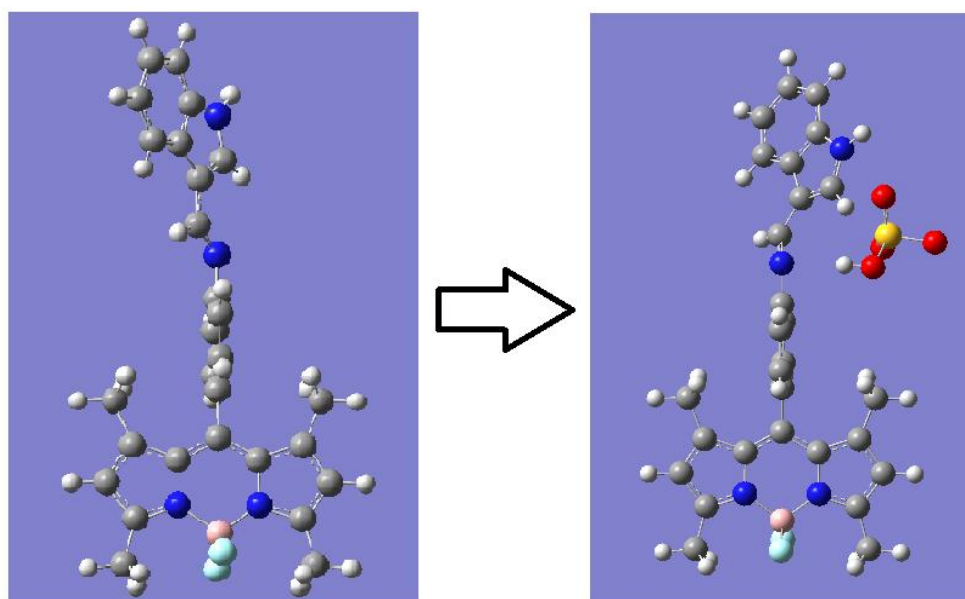

**Fig. S5.** Optimized structure of sensor 1 and 1+HSO<sub>4</sub><sup>-</sup> complex calculated on the DFT level by B3LYP method with the 6-31G\*\*basis set.

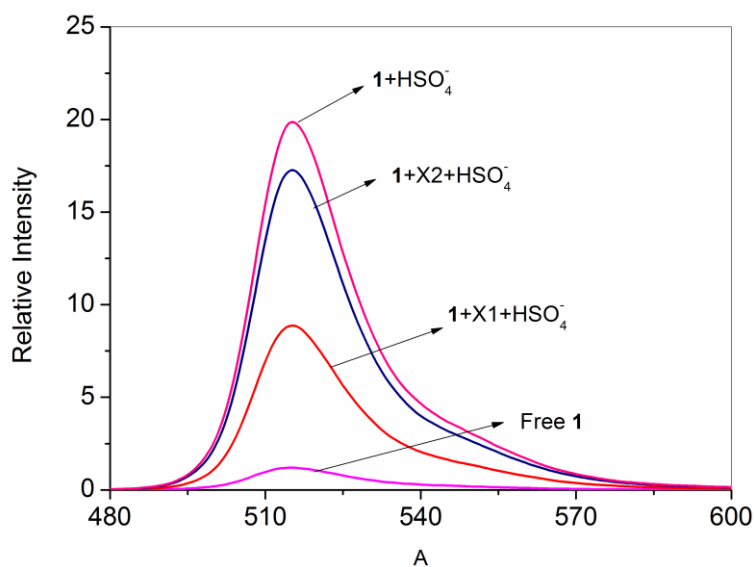

**Fig. S6.** Fluorescence spectra of **1** (5.0 μM) in CH<sub>3</sub>CN in the presence of HSO<sub>4</sub><sup>-</sup> (50 equiv.) and other anions (X1= F<sup>-</sup>, Cl<sup>-</sup>, Br<sup>-</sup>, I<sup>-</sup>, AcO<sup>-</sup>, ClO<sub>4</sub><sup>-</sup>, H<sub>2</sub>PO<sub>4</sub><sup>-</sup>; X2= Cl<sup>-</sup>, Br<sup>-</sup>, I<sup>-</sup>, AcO<sup>-</sup>, ClO<sub>4</sub><sup>-</sup>, H<sub>2</sub>PO<sub>4</sub><sup>-</sup>)

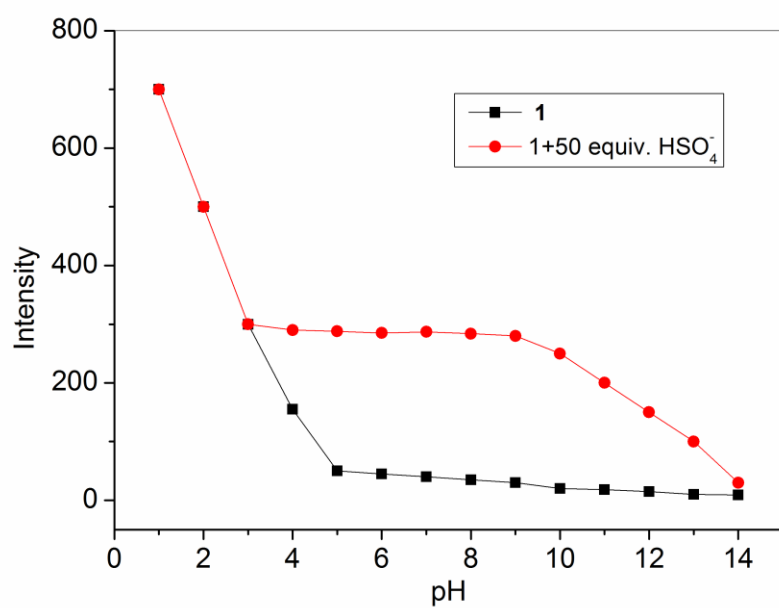

Fig. S7 Fluorescent intensity at 512 nm of sensor **1** and **1**+30 equiv. of HSO<sub>4</sub><sup>-</sup> in CH<sub>3</sub>CN/H<sub>2</sub>O (v:v, 1:1) solution with different pH condition.

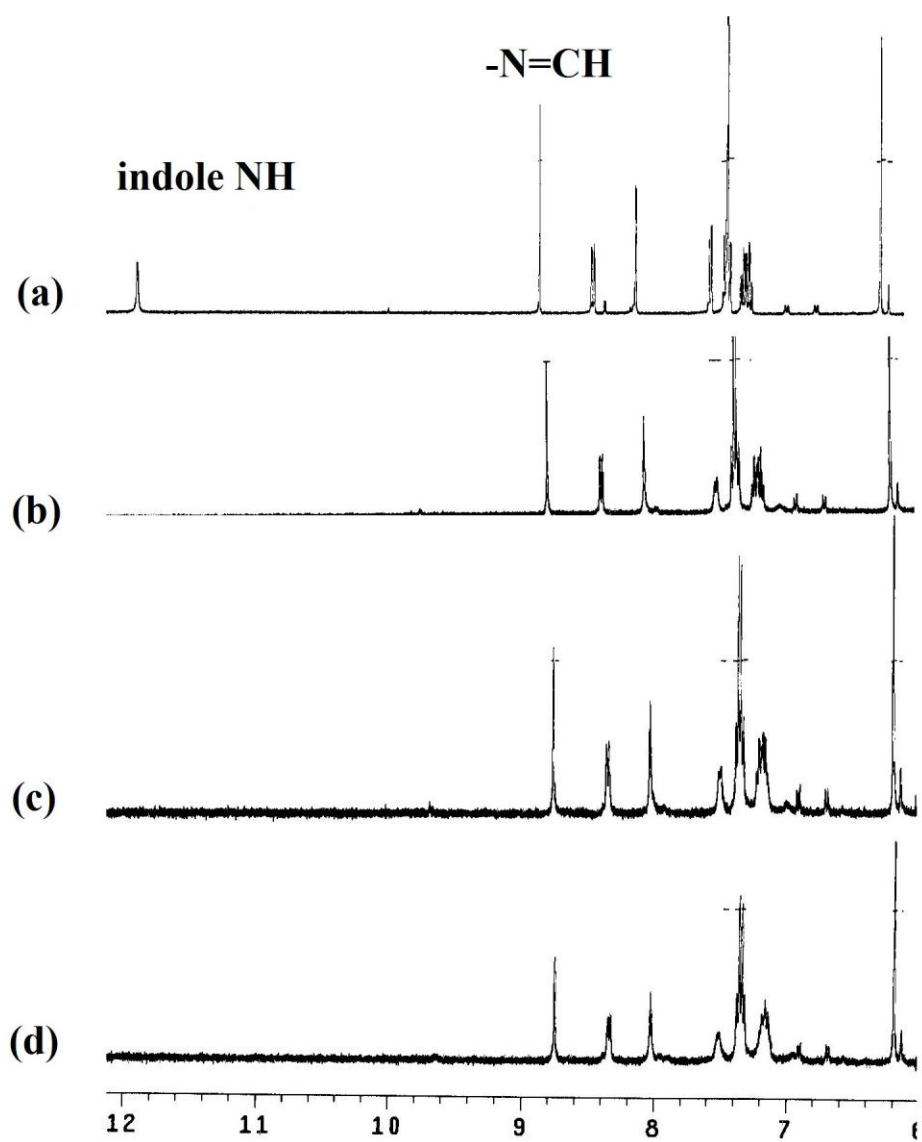

Fig. S8 Partial  $^1\text{H}$  NMR spectra of receptor **1** on addition of  $\text{F}^-$  (TBA salts) in  $\text{DMSO}-d_6$ : (a) 0 equiv.  $\text{F}^-$ ; (b) 0.5 equiv.  $\text{F}^-$ ; (c) 1 equiv.  $\text{F}^-$ ; (d) 3 equiv.  $\text{F}^-$ .

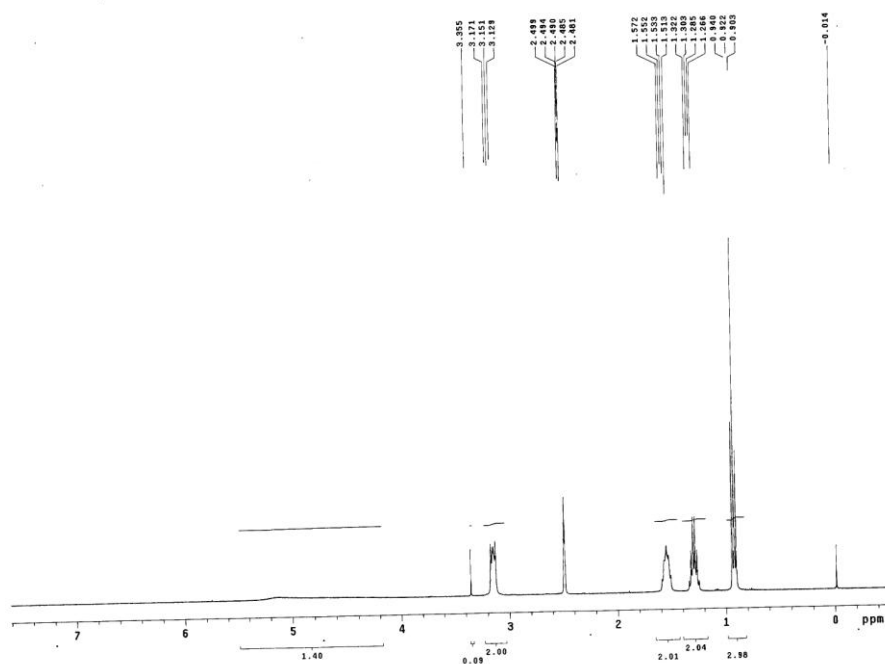

Fig. S9  $^1\text{H}$ NMR spectrum of TBAHSO<sub>4</sub> in DMSO-*d*<sub>6</sub> solvent

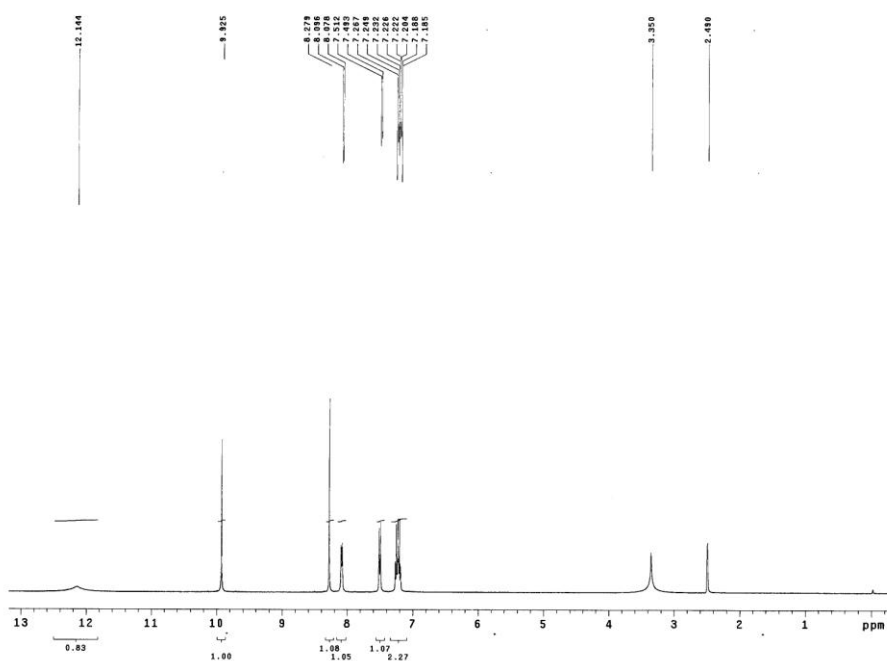

Fig. S10  $^1\text{H}$ NMR spectrum of Indole-3-carbaldehyde in DMSO-*d*<sub>6</sub> solvent

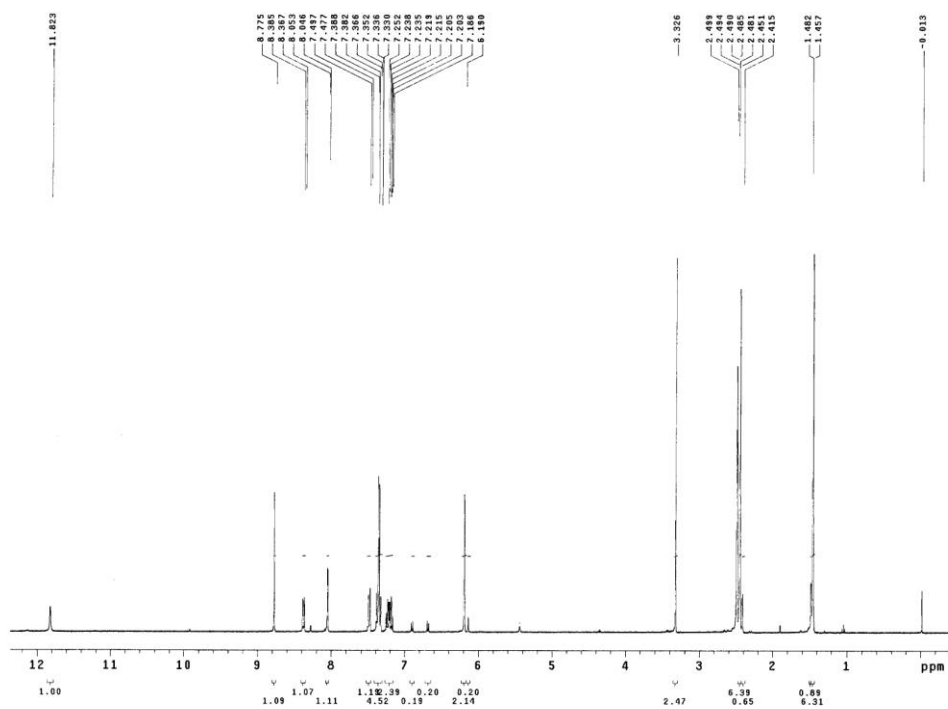

<sup>1</sup>H NMR spectrum of receptor **1** in DMSO-*d*<sub>6</sub> solvent

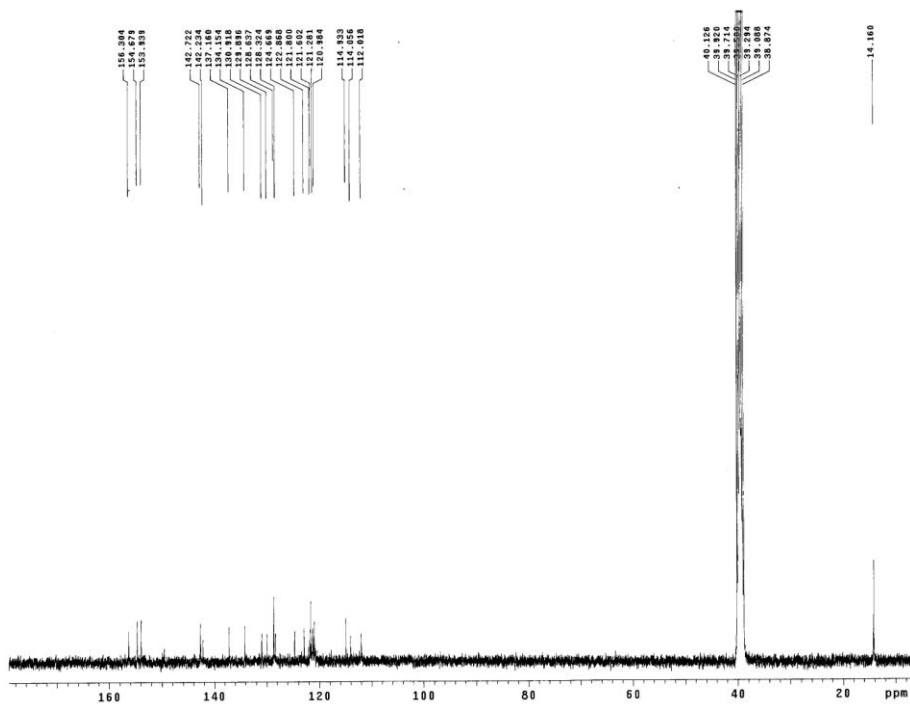

<sup>13</sup>C NMR spectrum of receptor **1** in DMSO-*d*<sub>6</sub> solvent



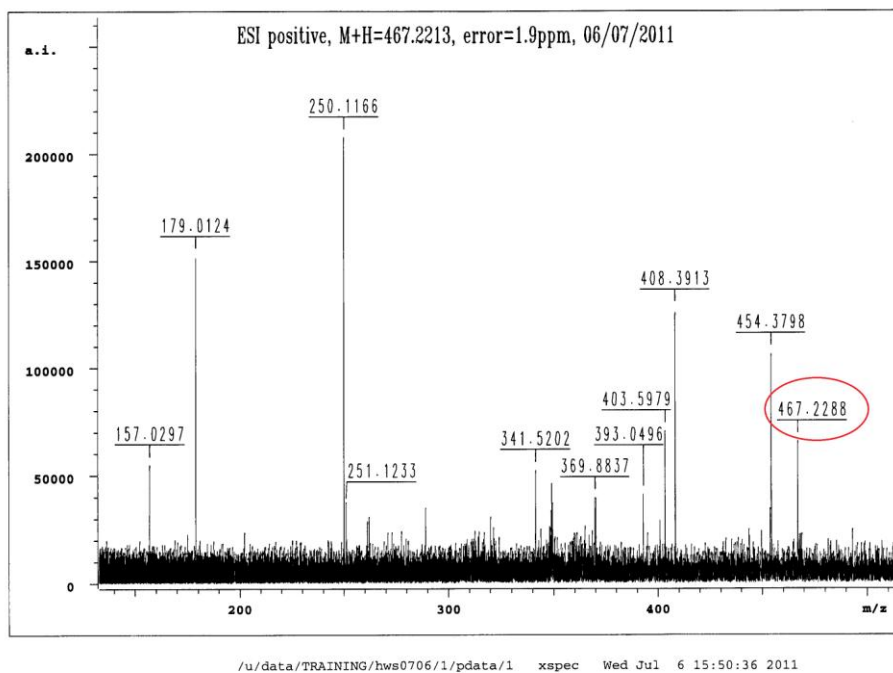

HR MS spectrum of receptor 1
